# Supplementary material
Source: HighWire-hosted journal article supplement (https://erj.ersjournals.com/content/55/5/2000881)
Supplement: inline-supplementary-material-1 [file inline-supplementary-material-1.pdf]

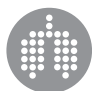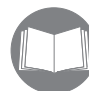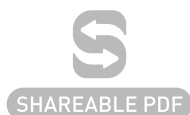

# The right treatment for the right patient with COPD: lessons from the IMPACT trial

Daiana Stolz<sup>1</sup> and Marc Miravittles<sup>2</sup> 

**Affiliations:** <sup>1</sup>Clinic of Respiratory Medicine and Pulmonary Cell Research, University Hospital, Basel, Switzerland. <sup>2</sup>Pneumology Dept, Hospital Universitari Vall d'Hebron/Vall d'Hebron Research Institute, CIBER de Enfermedades Respiratorias (CIBERES), Barcelona, Spain.

**Correspondence:** Marc Miravittles, Pneumology Dept, Hospital Universitari Vall d'Hebron, Pg. Vall d'Hebron 119-129, 08035 Barcelona, Spain. E-mail: marcmm@separ.es

 @ERSpublications

**Different patient characteristics have to be considered for prescription of triple therapy in COPD**  
<https://bit.ly/2xWq7IW>

**Cite this article as:** Stolz D, Miravittles M. The right treatment for the right patient with COPD: lessons from the IMPACT trial. *Eur Respir J* 2020; 55: 2000881 [<https://doi.org/10.1183/13993003.00881-2020>].

This single-page version can be shared freely online.

Long-acting bronchodilators are the basis of treatment for COPD [1]; however, there are some patients who suffer from frequent or severe exacerbations, despite maximal bronchodilation [2]. These patients are at increased risk of death and represent a great challenge in clinical practice [3]. Inhaled corticosteroids (ICS) are the basis of the treatment of asthma and are also effective, albeit to a lesser extent, in some patients with COPD [4]. Generally speaking, ICS are indicated in patients with COPD and exacerbations, despite bronchodilator treatment [1]. However, not all COPD patients respond to ICS and the long-term use of ICS in COPD may be associated with several side-effects [5, 6]. Therefore, the use of ICS for the prevention of exacerbations in COPD should not be a treatment “by default” and must be guided by criteria based on evidence [7]. In this respect, the InforMing the Pathway of COPD Treatment (IMPACT) study has provided very relevant information about the proper use of ICS, either in combination with a long-acting  $\beta_2$ -agonist (LABA) or in triple therapy with a LABA and a long-acting antimuscarinic agent (LAMA) [8]. The IMPACT trial included 10355 patients with COPD, randomised to receive a once-daily combination of fluticasone furoate (FF), umeclidinium (UMEC) and vilanterol (VI) (triple therapy), FF/VI or UMEC/VI, all administered in a single Ellipta inhaler during the 52-week study. The primary outcome was the annual rate of moderate or severe COPD exacerbations during treatment. The rate of exacerbations with triple therapy was a significant 15% lower compared with the FF/VI group and 25% lower compared with the UMEC/VI group, and there was a significantly higher incidence of pneumonia in the ICS groups than in the UMEC/VI group [8].
